# Supplementary material
Source: HighWire-hosted journal article supplement (https://bmjopenquality.bmj.com/highwire/filestream/147600/field_highwire_adjunct_files/0/bmjqs-2015-004596supp_new.pdf)
Supplement: bmjqs-2015-004596supp_new.pdf [file bmjqs-2015-004596supp_new.pdf]

**Surgical Innovation Centre  
1st Floor Paterson Building  
St Mary's Hospital  
London  
W2 1PE**

**Wednesday, 3rd of January 2024**

To whom it may concern,

I trust this letter finds you well. We are composing this Permission Statement to formally grant authorisation for the publication of images featuring our body parts depicted in Figures 1 and 3. We are the individuals shown in the images and are members of the research team; we hereby consent to the inclusion of these images in the submitted manuscript.

By providing this permission, we affirm our understanding of and agreement with the decision to showcase these images in relation to the research presented. We acknowledge that the use of these visuals is essential for the comprehensive communication of our findings and the scholarly discourse surrounding the subject matter.

Please contact us if any further clarification or documentation is required regarding this matter.

Yours sincerely,

Dr Kirsty Clarke, Mr Aws Almukhtar and Dr Lina Alim
